# Supplementary material for: Barbier reaction in the regime of metal oxide: the first example of carbonyl allylation mediated by tetragonal tin(ii) oxide
Source: Royal Society of Chemistry journal article supplement (doi:10.1039/b104500h), 2001-01-01

---

# Barbier Reaction in the Regime of Metal-Oxide: The First Example of Carbonyl Allylation Mediated by Tetragonal Tin(II)Oxide

---

Pradipta Sinha and Sujit Roy\*

*Organometallics & Catalysis Laboratory, Chemistry Department, Indian Institute of Technology, Kharagpur 721302, India. Fax: +91 3222 82252; Tel: +91 3222 83338; E-mail: sroy@chem.iitkgp.ernet.in*

## SUPPORTING INFORMATION: CONTENTS

(total 12 pages including Figures)

1. Methods.
2. List of  $^1\text{H}$  NMR,  $^{13}\text{C}$  NMR, EIMS and analytical data of the homoallylic alcohols (3a-3j).
3. Table containing XRD data (Table. S1).
4. Table containing XPS data (Table. S2).
5. Supplementary reference
6. XRD spectra (Figure S1-S5).
7. In-situ EIMS spectra of the reaction between  $\beta\text{-SnO}$ ,  $\text{Pd}_2(\text{dba})_3$  and allyl bromide (Figure S6).

## 1. Methods.

### General Methods.

All reactions were performed under an inert atmosphere of argon. Substituted allyl bromides were prepared from the corresponding alcohols (Lancaster) using standard protocol.  $\beta$ -tin(II)oxide, copper(I)oxide, copper(I)chloride,  $\text{PtCl}_2(\text{PPh}_3)_3$ ,  $\text{Pd}_2(\text{dba})_3$ ,  $\text{Pd}_2(\text{dba})_3 \cdot \text{CHCl}_3$ ,  $\text{PdCl}_2(\text{PPh}_3)_2$ ,  $\text{PdCl}_2(\text{PhCN})_2$  and  $\text{NiCl}_2(\text{PPh}_3)_2$  catalysts were prepared rather easily according to literature procedure<sup>1-4</sup>. All the starting materials were >98% pure vide NMR. Pre-coated silica gel 60F<sub>254</sub>, Merck was used for thin layer chromatography and silica gel 60-120 mesh, SRL was used for column chromatography.

<sup>1</sup>H NMR spectra were taken in  $\text{CDCl}_3$  or  $\text{DMSO-d}_6$  on Bruker-300 spectrometer. EIMS (70 eV) spectra were recorded using VG Autospec M mass spectrometer. GC analysis was carried out in a Chemito-8610 instrument using Supelcowax-10 30, capillary column. X-ray photoelectron spectra were recorded by VG Escalab MKII spectrometer. X-ray powder diffraction data was obtained using Phillips PW-1840 instrument using a Mo-K $\alpha$  target at 40 KV.

### Typical Procedure for the Synthesis of Homoallylic Alcohols using $\beta$ -SnO and $\text{PtCl}_2(\text{PPh}_3)_2$ as catalyst.

A mixture of 4-chlorobenzaldehyde (140 mg, 1 mM) and 1-bromobut-2-en (270 mg, 2 mM) in tetrahydrofuran (2 mL) was added slowly to a refluxing solution containing  $\beta$ -SnO (202 mg, 1.5 mM) and dichlorobis(triphenylphosphine)platinum(II) (8 mg, 0.01 mM) in tetrahydrofuran-water (2.5 mL-0.5 mL) and under argon. The mixture was further refluxed for 2.5 h. (TLC monitoring on silica gel, eluent: n-hexane: ethyl acetate 9:1). An aqueous solution of ammonium fluoride (15%, 10 mL) was added to the reaction mixture and organic layer was extracted with diethyl ether (3 x 10 mL), washed with water (2 x 10 mL), brine (2 x 10 mL) and dried over magnesium sulfate. Solvent removal followed by column chromatography (eluent n-hexane: ethyl acetate 9:1) afforded pure 1-(4-chlorophenyl)-2-methylbut-3-en-1-ol (161 mg, 82% w.r.t. aldehyde).

### Synthesis of Homoallylic Alcohols using $\beta$ -SnO and $\text{Cu}_2\text{O}$ as catalyst.

Similar procedure as above was followed for the synthesis of homoallylic alcohols using copper(I) oxide as catalyst (14 mg, 0.1 mM), the solvent used was dichloromethane-water (4.5 mL-0.5 mL).

### Details of NMR Experiments.

A mixture of  $\beta$ -SnO (269 mg, 2 mM) and palladium(0)dibenzylideneacetone (18 mg, 0.02 mM) in tetrahydrofuran (3 mL) under argon atmosphere was refluxed for 0.5 h. Allyl bromide (484 mg, 4 mM) was added to the mixture dropwise. The mixture was further refluxed for 10 h. The excess tin oxide was filtered off under argon and solvent was removed under vacuuo. The residue was dissolved in  $\text{DMSO-d}_6$  and examined by <sup>1</sup>H NMR, the resulting spectrum is shown in Figure 1 (c).

### Details of XRD Experiments.

In a typical procedure  $\beta$ -SnO (269 mg, 2 mM) and  $\text{PtCl}_2(\text{PPh}_3)_2$  (7 mg, 0.01 mM) were taken up in tetrahydrofuran-water (2.4 mL-0.6 mL) under argon atmosphere. After the mixture was refluxed for 0.5 h, a mixture of allyl bromide (484 mg, 4 mM) and 4-chlorobenzaldehyde (280 mg, 2 mM) in tetrahydrofuran (3 mL) was added dropwise. The mixture was refluxed for 7 h. The solvent was removed under reduced pressure. The solid after drying under vacuuo was subjected to XRD analysis.

All XRD spectra are shown in Figure S1 ( $\beta$ -SnO), S2 ( $\beta$ -SnO in THF-H<sub>2</sub>O), S3 ( $\text{Cu}_2\text{O}$ ), S4 ( $\beta$ -SnO+  $\text{Cu}_2\text{O}$  in THF-H<sub>2</sub>O) and S5 ( $\beta$ -SnO+  $\text{PtCl}_2(\text{PPh}_3)_3$ + allyl bromide in THF-H<sub>2</sub>O).

### Details of XPS Experiments.

A mixture of  $\beta$ -SnO (606 mg, 4.5 mM) and copper(I) oxide (86 mg, 0.6 mM) in dichloromethane-water (12.6 mL-1.4 mL) under argon atmosphere was refluxed for 0.5 h. Allyl bromide (968 mg, 8 mM) was added to the mixture dropwise. The mixture was further refluxed for 7 h. The solvent was removed under reduced pressure. The solid after drying under vacuuo was subjected to XPS analysis.

Another sample was prepared under identical condition as above but in absence of allyl bromide.

### Details of in-situ EIMS Experiments.

A mixture of  $\beta$ -SnO (269 mg, 2 mM) and palladium(0)dibenzylideneacetone (18 mg, 0.02 mM) in tetrahydrofuran (3 mL) under argon atmosphere was refluxed for 0.5 h. Allyl bromide (484 mg, 4 mM) was added to the mixture dropwise. The mixture was further refluxed for 10 h. The excess halide was removed under vacuum and the upper solution was directly injected into the mass spectrometer probe, the resulting spectrum is shown in Figure S6.

## 2. List of $^1\text{H}$ NMR, $^{13}\text{C}$ NMR, EIMS and analytical data of the homoallylic alcohols

**Compd 3a:** (syn:anti=55:45)  $^1\text{H}$  NMR ( $\text{CDCl}_3$ ):  $\delta$  (anti isomer) 0.88 (d, 3H,  $J = 5.0$  Hz), 2.19 (br s, 1H, -OH), 2.35-2.60 (m, 1H), 4.33 (m, 1H), 5.00-5.24 (m, 2H), 5.65-5.77 (m, 1H), 7.22-7.34 (m, 4H);  $\delta$  (syn isomer) 0.99 (d, 3H,  $J = 5.0$  Hz), 1.92 (br s, 1H, -OH), 2.35-2.60 (m, 1H), 4.59 (m, 1H), 5.00-5.24 (m, 2H), 5.65-5.77 (m, 1H), 7.22-7.34 (m, 4H);  $^{13}\text{C}$  NMR ( $\text{CDCl}_3$ ):  $\delta$  14.02, 16.38 (anti+syn), 38.00, 44.76, 46.24 (anti+syn), 115.82, 117.00 (anti+syn), 127.21, 127.87, 128.35, 133.39, 141.07, 140.15 (anti+syn); EIMS  $m/z$  (rel abundance): 196 ( $\text{M}^+$ , <1), 178 [( $\text{M}-\text{H}_2\text{O}$ ) $^+$ , <1], 163 (<1), 143 (31), 141 (100), 113 (14), 77 (41), 55 (8); Anal. ( $\text{C}_{11}\text{H}_{13}\text{OCl}$ ) calcd, C: 67.35, H: 6.63; found, C: 66.95, H: 6.29.

**Compd 3b:**  $^1\text{H}$  NMR ( $\text{CDCl}_3$ ):  $\delta$  0.92 (s, 3H), 0.96 (s, 3H), 2.15 (br s, 1H, -OH), 4.00 (s, 1H), 4.19 (s, 9H), 4.92-5.04 (m, 2H), 5.79-5.93 (m, 1H);  $^{13}\text{C}$  NMR ( $\text{CDCl}_3$ ):  $\delta$  22.15, 23.76, 41.37, 65.67, 67.61, 68.34, 69.79, 112.35, 145.39; EIMS  $m/z$  (rel abundance): 284 ( $\text{M}^+$ , 29), 215 (82), 186 (100), 121 (47), 56 (19); Anal. ( $\text{C}_{16}\text{H}_{20}\text{OFe}$ ) calcd, C: 67.61, H: 7.04; found, C: 67.35, H: 6.79.

**Compd 3c:**  $^1\text{H}$  NMR ( $\text{CDCl}_3$ ):  $\delta$  1.04 (s, 3H), 1.08 (s, 3H), 2.16 (br s, 1H, -OH), 4.71 (s, 1H), 5.08-5.20 (m, 2H), 5.90-6.04 (m, 1H), 6.93-6.98 (m, 2H), 7.19-7.26 (m, 1H);  $^{13}\text{C}$  NMR ( $\text{CDCl}_3$ ):  $\delta$  0.96, 21.58, 24.24, 42.22, 114.26, 124.34, 125.41, 125.99, 128.24, 144.49; EIMS  $m/z$  (rel abundance): 165 [( $\text{M}-\text{H}_2\text{O}$ ) $^+$ , (9)], 113 (100), 85 (24), 41 (21); Anal. ( $\text{C}_{10}\text{H}_{14}\text{O}_5$ ) calcd, C: 65.93, H: 7.64; found, C: 65.80, H: 7.47.

**Compd 3d:**  $^1\text{H}$  NMR ( $\text{CDCl}_3$ ):  $\delta$  1.03 (d, 3H,  $J = 5.9$  Hz), 1.35-1.69 (m, 5H), 2.14-2.25 (m, 1H), 3.09 (br s, 1H, -OH), 3.37-3.50 (m, 1H), 5.01-5.11 (m, 2H), 5.65-5.86 (m, 1H);  $^{13}\text{C}$  NMR ( $\text{CDCl}_3$ ):  $\delta$  14.37, 16.20, 18.01, 21.92, 33.93, 74.60, 115.09, 140.99, 178.02; EIMS  $m/z$  (rel abundance): 157 ( $\text{M}^+$ , 20), 139 [( $\text{M}-\text{H}_2\text{O}$ ) $^+$ , 44], 121 (60), 95 (72), 79 (44), 69 (68), 55 (100), 43 (62); Anal. ( $\text{C}_9\text{H}_{16}\text{O}_2$ ) calcd, C: 69.23, H: 10.26; found, C: 68.62, H: 9.71.

**Compd 3e:**  $^1\text{H}$  NMR ( $\text{CDCl}_3$ ):  $\delta$  (anti & syn isomer) 0.89 (m, 3H), 1.26-1.47 (m, 2H), 1.59-1.65 (m, 2H), 2.1 (m, 1H), 2.46-2.90 (m, 2H), 3.70-3.77 (m, 1H), 5.05-5.23 (m, 2H), 5.60-5.79 (m, 1H), 7.24-7.36 (m, 5H);  $^{13}\text{C}$  NMR ( $\text{CDCl}_3$ ):  $\delta$  14.10, 20.41, 32.23, 33.25 (anti+syn), 40.94 41.42 (anti+syn), 50.06, 74.79, 75.25 (anti+syn), 117.05, 117.63 (anti+syn), 126.36, 128.37, 129.37, 138.51, 139.01, 139.22 (anti+syn); EIMS  $m/z$  (rel abundance): 205 ( $\text{M}^+$ , 6), 186 [( $\text{M}-\text{H}_2\text{O}$ ) $^+$ , 20], 143 (50), 121 (78), 92 (100), 91 (82), 84 (38), 77 (14), 55 (26); Anal. ( $\text{C}_{14}\text{H}_{20}\text{O}$ ) calcd, C: 82.35, H: 9.80; found, C: 82.16, H: 9.61.

**Compd 3f:**  $^1\text{H}$  NMR (syn:anti=42:58) ( $\text{CDCl}_3$ ):  $\delta$  (anti isomer) 0.83 (t, 3H,  $J = 6.5$  Hz), 1.22-1.41 (m, 4H), 2.15 (d, 1H,  $J = 5$  Hz, -OH), 2.31-2.36 (m, 1H), 4.94-5.07 (m, 2H), 5.17 (d, 1H,  $J = 3.2$  Hz), 5.58-5.76 (m, 1H), 7.23-7.46 (m, 3H);  $\delta$  (syn isomer) 0.83 (t, 3H,  $J = 6.5$  Hz), 1.22-1.41 (m, 4H), 2.02 (d, 1H,  $J = 5$  Hz, -OH), 2.31-2.36 (m, 1H), 4.94-5.07 (m, 2H), 5.22 (d, 1H,  $J = 3.2$  Hz), 5.58-5.76 (m, 1H), 7.23-7.46 (m, 3H);  $^{13}\text{C}$  NMR ( $\text{CDCl}_3$ ):  $\delta$  13.66, 20.28, 30.39, 32.77, 49.79, 50.76 (anti+syn), 117.02, 118.71 (anti+syn), 126.90, 128.83, 128.89, 129.35, 132.18, 132.92, 137.78, 138.58 (anti+syn); Anal. ( $\text{C}_{13}\text{H}_{16}\text{OCl}_2$ ) calcd, C: 60.46, H: 6.20; found, C: 60.18, H: 5.87.

**Compd 3g:** (syn:anti=26:74)  $^1\text{H}$  NMR ( $\text{CDCl}_3$ ):  $\delta$  (anti isomer) 0.87 (d, 3H,  $J = 5.3$  Hz), 2.17 (br s, 1H, -OH) 2.43-2.61 (m, 1H), 4.38 (d, 1H,  $J = 5.3$  Hz), 5.16-5.25 (m, 2H), 5.71-5.91 (m, 1H), 7.26-7.39 (m, 5H);  $\delta$  (syn isomer) 0.99 (d, 3H,  $J = 5.3$  Hz), 1.62 (br s, 1H, -OH) 2.43-2.61 (m, 1H), 4.63 (d, 1H,  $J = 5.3$  Hz), 5.16-5.25 (m, 2H), 5.71-5.91 (m, 1H), 7.26-7.39 (m, 5H); EIMS  $m/z$  (rel abundance): 162 ( $\text{M}^+$ , <1), 144 [( $\text{M}-\text{H}_2\text{O}$ ) $^+$ , (2)], 129 (3), 107 (100), 79 (21), 56 (3).

**Compd 3h:** (syn:anti=50:50)  $^1\text{H}$  NMR ( $\text{CDCl}_3$ ):  $\delta$  (anti isomer) 0.88 (m, 3H), 1.02 (d, 3H,  $J = 3.13$  Hz), 1.25-1.35 (m, 16H), 2.15-2.21 (m, 1H), 3.35-3.44 (m, 1H), 4.99-5.10 (m, 2H), 5.64-5.81 (m, 1H);  $\delta$  (syn isomer) 0.88 (m, 3H), 1.09 (d, 3H,  $J = 3.13$  Hz), 1.25-1.35 (m, 16H), 2.15-2.21 (m, 1H), 3.35-3.44 (m, 1H), 4.99-5.10 (m, 2H), 5.64-5.81 (m, 1H);  $^{13}\text{C}$  NMR ( $\text{CDCl}_3$ ):  $\delta$  14.14, 16.31 (anti+syn), 22.71, 25.81, 26.13, 28.98, 29.64, 31.95, 34.12, 34.31, 43.54, 44.14 (anti+syn), 74.68, 115.08, 116.09 (anti+syn), 140.39, 141.19 (anti+syn); EIMS  $m/z$  (rel abundance): 212 ( $\text{M}^+$ , 14), 194 [( $\text{M}-\text{H}_2\text{O}$ ) $^+$ , 12], 157 (20), 97 (52), 83 (84), 69 (70), 56 (100); Anal. ( $\text{C}_{14}\text{H}_{28}\text{O}$ ) calcd, C: 79.25, H: 13.21; found, C: 78.65, H: 12.82.

**Compd 3i:**  $^1\text{H}$  NMR ( $\text{CDCl}_3$ ):  $\delta$  1.23-1.37 (m, 6H), 2.26 (m, 2H) 2.42 (m, 2H), 3.61 (br s, 1H, -OH), 4.18 (m, 2H), 5.02-5.12 (m, 2H), 5.73-5.90 (m, 1H);  $^{13}\text{C}$  NMR ( $\text{CDCl}_3$ ):  $\delta$  14.09, 26.75, 44.23, 46.43, 60.45, 70.57, 118.40, 133.61, 172.75; EIMS  $m/z$  (rel abundance): 131 (76), 127 (12), 118 (20), 103 (20), 85 (100), 82 (48), 70 (16), 55 (22), 50 (42); Anal. ( $\text{C}_9\text{H}_{16}\text{O}_3$ ) calcd, C: 62.79, H: 9.30; found, C: 61.92, H: 8.92.

**Compd 3j:**  $^1\text{H}$  NMR ( $\text{CDCl}_3$ ):  $\delta$  1.55 (s, 1H, -OH), 2.89-3.19 (m, 2H) 4.97-5.14 (m, 2H), 5.63-5.84 (m, 1H), 7.26-7.75 (m, 10H);  $^{13}\text{C}$  NMR ( $\text{CDCl}_3$ ):  $\delta$  44.06, 81.39, 120.38, 125.62, 128.06, 128.89, 130.17, 132.37, 132.70, 134.61, 141.82, 200.68; EIMS  $m/z$  (rel abundance): 252 ( $\text{M}^+$ , 4), 234 [( $\text{M}-\text{H}_2\text{O}$ ) $^+$ , 14], 211 (52), 147 (54), 105 (100), 77 (62), 51 (12); Anal. ( $\text{C}_{17}\text{H}_{16}\text{O}_2$ ) calcd, C: 80.95, H: 6.35; found, C: 80.32, H: 5.89.

**3. Table S1.** Table containing XRD data.<sup>\$</sup>

| Fig. | Compound                                                                                                                                                                                 | Observed d-values          |
|------|------------------------------------------------------------------------------------------------------------------------------------------------------------------------------------------|----------------------------|
| S1   | $\beta$ -SnO                                                                                                                                                                             | 3.208, 2.717, 2.437, 1.799 |
| S2   | $\beta$ -SnO in THF-H <sub>2</sub> O                                                                                                                                                     | 3.028, 2.717, 2.437, 1.799 |
| S3   | Cu <sub>2</sub> O                                                                                                                                                                        | 2.478, 2.126, 1.507, 1.289 |
| S4   | $\beta$ -SnO+Cu <sub>2</sub> O                                                                                                                                                           | 3.028, 2.478, 2.126        |
| S5   | Inorganic Residue from the reaction of [ $\beta$ -SnO + PtCl <sub>2</sub> (PPh <sub>3</sub> ) <sub>3</sub> + 4-chlorobenzaldehyde + allylbromide in THF-H <sub>2</sub> O] after work up. | 3.446, 3.321, 2.666, 1.799 |

\$ JCPDS references:  $\beta$ -SnO: 6-0395; SnO<sub>2</sub>: 21-1250; Cu<sub>2</sub>O: 5-0667

**4. Table S2.** Table containing XPS data of ( $\beta$ -SnO+Cu<sub>2</sub>O) (for details see text)

| Element                 | Treatment                   | Binding Energy (eV)         |
|-------------------------|-----------------------------|-----------------------------|
| C (1s)                  | Nil                         | 284.5, 287.6                |
| C (1s)                  | Refluxed with allyl bromide | 280.80, 283.2, 284.5, 287.6 |
| Sn (3d <sub>5/2</sub> ) | Nil                         | 486.9                       |
| Sn (3d <sub>5/2</sub> ) | Refluxed with allyl bromide | 478.2                       |
| Cu (2p <sub>3/2</sub> ) | Nil                         | 932.1                       |
| Cu (2p <sub>3/2</sub> ) | Refluxed with allyl bromide | 923.7                       |
| O (1s)                  | Nil                         | 531                         |
| O (1s)                  | Refluxed with allyl bromide | 525.3, 529.3                |

**5. Reference:**

1. Brauer, G.(ed.) *Handbook of Preparative Inorganic Chemistry* **Vol 1**; Academic Press: New York, 1963.
2. Brauer, G.(ed.) *Handbook of Preparative Inorganic Chemistry* **Vol 2**; Academic Press: New York, 1965.
3. Bailar, J. C. (Jr.), Itatori, H. *Inorg. Chem.* **1965**, 4, 1618.
4. Herrmann, W. A.; Salzer, A.(ed.) *Synthetic Methods of Organometallic and Inorganic Chemistry* **Vol 1**; George Thieme Verlag: New York, 1996.

**Figure S1** XRD spectra of  $\beta$ -SnO

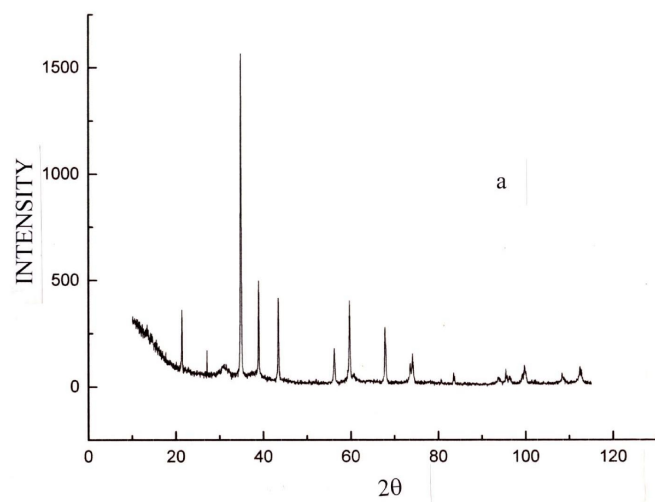

Figure S2. XRD spectra of  $\beta$ -SnO in THF-H<sub>2</sub>O

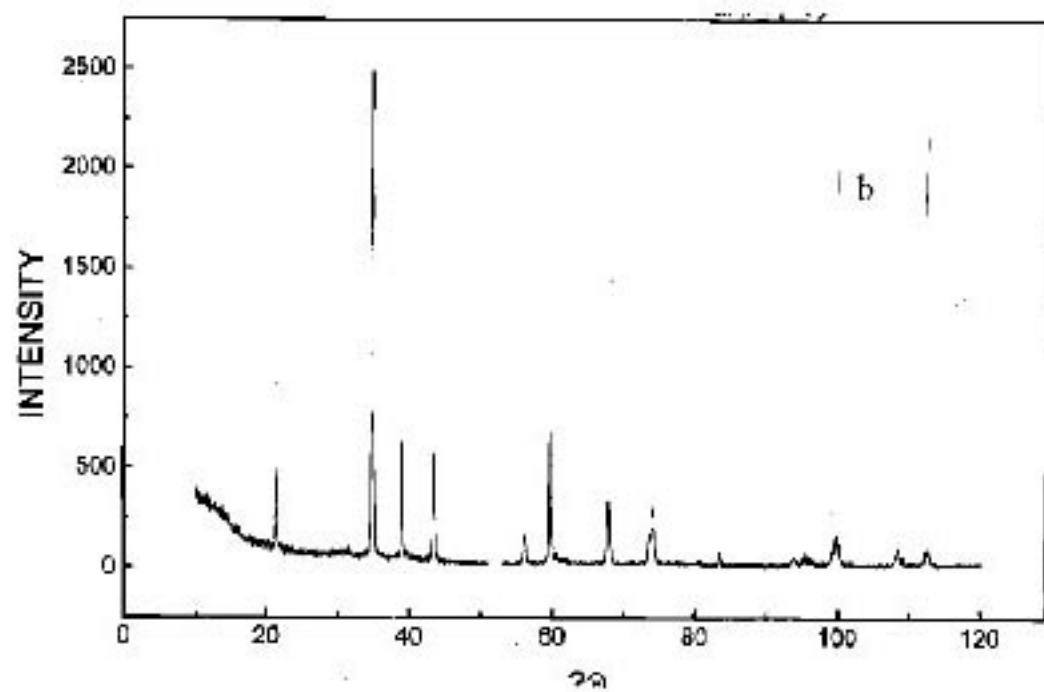



**Figure S3.** XRD spectra of  $\text{Cu}_2\text{O}$

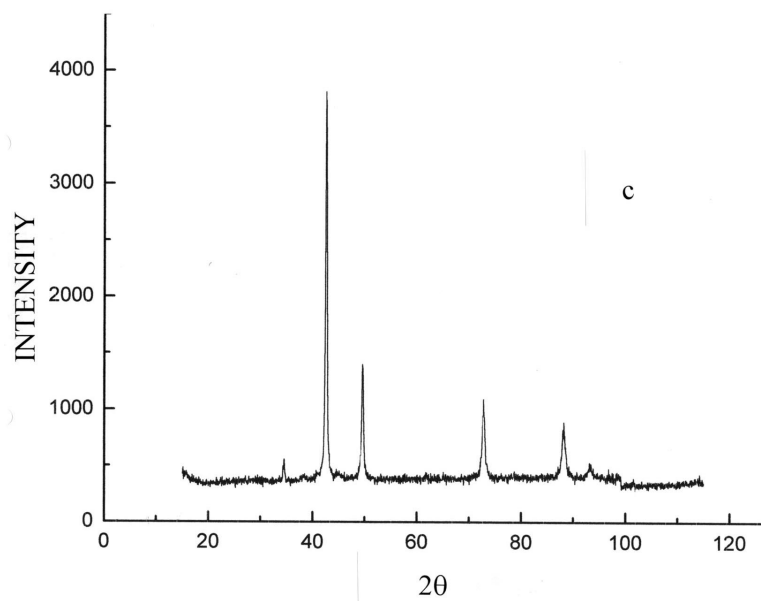

**Figure S4.** XRD spectra of  $\beta$ -SnO+Cu<sub>2</sub>O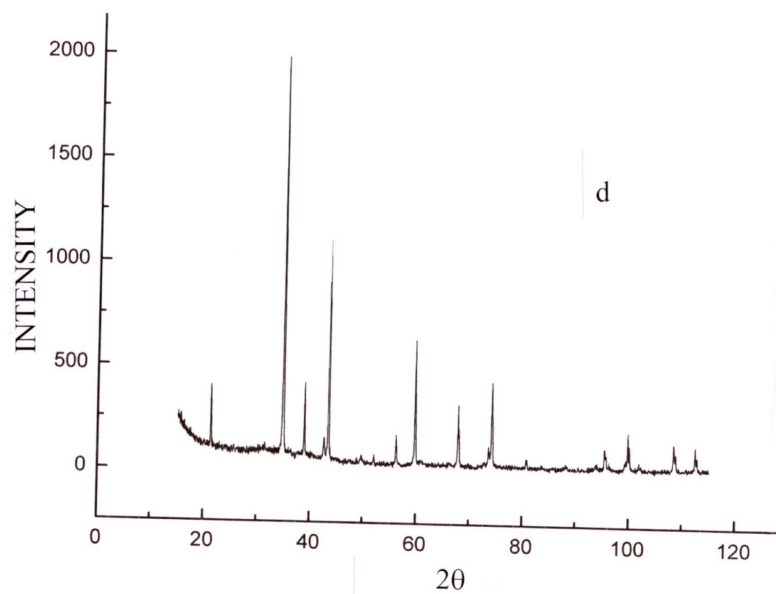

**Figure S5.** XRD spectra of Inorganic Residue from the reaction of  
[ $\beta$ -SnO +  $\text{PtCl}_2(\text{PPh}_3)_3$  + 4-chlorobenzaldehyde + allylbromide in THF- $\text{H}_2\text{O}$ ] after work up.

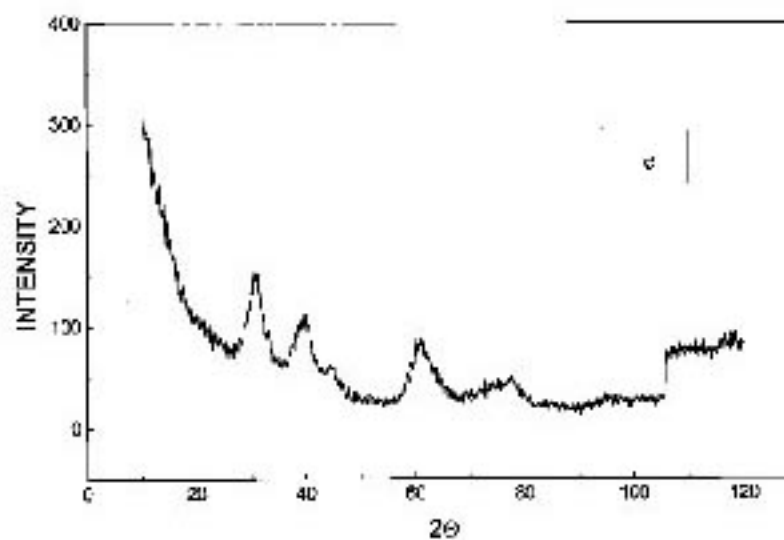

Figure S6. In-situ EIMS spectra of the reaction between  $\beta$ -SnO,  $\text{Pd}_2(\text{dba})_3$  and allyl bromide

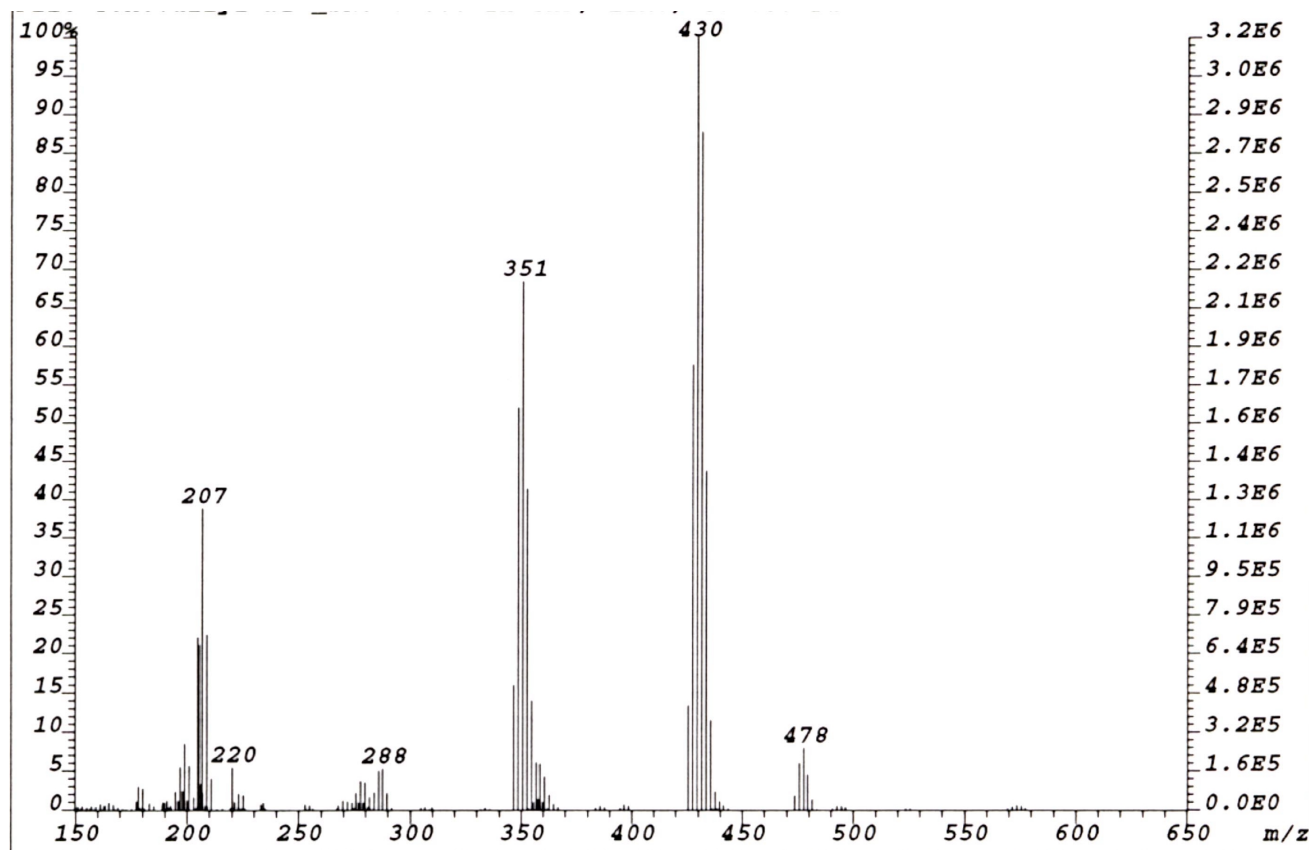

Supplement: b104500h.pdf [file b104500h.pdf]
